# Supplementary material
Source: Research Square preprint supplement (doi:10.21203/rs.3.rs-9759959/v1)
Supplement: Supplementary file 1 [file 1acc99a69f176fe9f55bf48c.docx]

**KINEMATIC AND SPATIOTEMPORAL FEAURES RESULTS EXTRACTED FROM THE SINGLE WALKING TASK**

**Table S1**. Kinematic variables of PD with and without FOG and PSP extracted from single walking task. Mean, standard deviation and p-values for each group were reported.

| **Joint** | **Kinematic Variables** | **PD-FOG** | **PD+FOG** | **PSP** | **p-value** | **PD-FOG vs**  **PD+FOG** | **PD-FOG vs**  **PSP** | **PD+FOG vs**  **PSP** |
| --- | --- | --- | --- | --- | --- | --- | --- | --- |
| Trunk | Anterior Tilt | 41.12 ± 8.81 | 42.68 ± 9.40 | 45.30 ± 12.44 | 0.364 | **-** | **-** | **-** |
| Posterior Tilt | 38.16 ± 8.69 | 39.43 ± 9.78 | 42.40 ± 12.51 | 0.382 | **-** | **-** | **-** |
| ROM Tilt | 2.96 ± 1.93 | 3.25 ± 1.51 | 2.90 ± 0.93 | 0.862 | **-** | **-** | **-** |
| Internal Rotation | -3.00 ± 0.92 | -3.08 ± 1.04 | -4.26 ± 2.29 | 0.091 | **-** | **-** | **-** |
| External Rotation | 2.88 ± 0.89 | 2.97 ± 0.90 | 4.24 ± 2.20 | 0.054 | **-** | **-** | **-** |
| ROM Rotation | 5.88 ± 1.76 | 6.05 ± 1.79 | 8.50 ± 4.45 | 0.066 | **-** | **-** | **-** |
| High Obliquity | 1.57 ± 0.91 | 2.30 ± 1.45 | 1.73 ± 0.99 | **0.047** | 0.128 | 0.710 | 0.710 |
| Low Obliquity | -1.58 ± 0.93 | -2.31 ± 1.60 | -1.73 ± 0.90 | 0.051 | **-** | **-** | **-** |
| ROM Obliquity | 3.15 ± 1.82 | 4.62 ± 3.04 | 3.47 ± 1.89 | **0.047** | 0.137 | 0.691 | 0.691 |
| Pelvis | Antiversum Tilt | 15.72 ± 6.91 | 8.96 ± 3.93 | 5.88 ± 6.04 | **<0.001** | **0.001** | **0.000** | **0.000** |
| Retroversum Tilt | 11.50 ± 5.01 | 4.19 ± 5.34 | 3.09 ± 5.92 | **<0.001** | **0.000** | **0.000** | **0.000** |
| ROM Tilt | 4.22 ± 4.63 | 4.77 ± 3.54 | 2.79 ± 0.77 | 0.720 | **-** | **-** | **-** |
| Internal Rotation | -3.37 ± 1.59 | -4.45 ± 1.85 | -3.79 ± 1.72 | **0.023** | 0.174 | 0.243 | 0.243 |
| External Rotation | 3.30 ± 1.73 | 4.30 ± 2.14 | 4.01 ± 1.93 | **0.026** | 0.372 | 0.141 | 0.141 |
| ROM Rotation | 6.67 ± 3.23 | 8.75 ± 3.86 | 7.80 ± 3.60 | **0.021** | 0.241 | 0.164 | 0.164 |
| High Obliquity | 2.01 ± 0.92 | 2.42 ± 1.20 | 1.65 ± 0.57 | 0.771 | **-** | **-** | **-** |
| Low Obliquity | -2.38 ± 1.18 | -2.51 ± 1.23 | -1.65 ± 0.53 | 0.435 | **-** | **-** | **-** |
| ROM Obliquity | 4.39 ± 1.80 | 4.94 ± 2.41 | 3.29 ± 1.05 | 0.767 | **-** | **-** | **-** |
| Hip | Internal Rotation | 12.79 ± 14.63 | 9.76 ± 8.11 | 9.89 ± 14.50 | 0.470 | **-** | **-** | **-** |
| Extenal Rotation | -1.37 ± 14.97 | -5.15 ± 8.46 | -3.09 ± 14.70 | 0.461 | **-** | **-** | **-** |
| ROM Rotation | 14.16 ± 4.28 | 14.91 ± 3.24 | 12.98 ± 2.83 | 0.902 | **-** | **-** | **-** |
| Flexion | 32.34 ± 13.07 | 29.91 ± 8.47 | 24.94 ± 8.00 | **0.044** | 1.000 | **0.048** | **0.048** |
| Extension | -5.81 ± 13.59 | -13.24 ± 10.44 | -12.55± 6.47 | **0.016** | 0.051 | 0.405 | 0.405 |
| ROM Flexion/Extension | 38.15 ± 13.00 | 43.15 ± 8.48 | 37.49 ± 6.47 | 0.601 | **-** | **-** | **-** |
| Knee | Internal Rotation | -1.78 ± 6.37 | -0.80 ± 11.23 | 9.35 ± 17.51 | **0.041** | 1.000 | **0.048** | **0.048** |
| External Rotation | -26.52 ± 9.85 | -15.90 ± 12.44 | -9.82 ± 14.83 | **<0.001** | **0.014** | **0.000** | **0.000** |
| ROM Rotation | 24.73 ± 10.21 | 15.10 ± 9.76 | 19.18 ± 10.23 | **0.003** | **0.005** | 0.247 | 0.247 |
| Flexion | 56.22 ± 9.18 | 52.07 ± 7.79 | 48.22 ± 6.65 | **0.011** | 0.099 | 0.160 | 0.160 |
| Extension | 3.47 ± 7.53 | 1.85 ± 3.36 | 5.12 ± 16.20 | 0.895 | **-** | **-** | **-** |
| ROM Flexion/Extension | 52.75 ± 7.97 | 50.22 ± 6.93 | 46.60 ± 6.98 | 0.052 | **-** | **-** | **-** |
| Ankle | Dorsiflexion | 12.28 ± 4.33 | 12.27 ± 4.51 | 12.15 ± 7.35 | 0.846 | **-** | **-** | **-** |
| Plantarflexion | -17.06 ± 6.78 | -15.09 ± 5.52 | -10.58 ± 7.99 | **0.024** | 0.809 | **0.046** | **0.046** |
| ROM Dors-Plantarflexion | 29.34 ± 7.75 | 27.36 ± 5.08 | 22.73 ± 5.44 | **0.022** | 0.540 | 0.070 | 0.070 |

**Table S2.** Spatiotemporal variables of PD with and without FOG and PSP extracted from single walking task. Mean, standard deviation and p-values for each group were reported.

| **Spatiotemporal Variables** | **PD-FOG** | **PD+FOG** | **PSP** | **p-value** | **PD-FOG**  **vs**  **PD+FOG** | **PD-FOG vs**  **PSP** | **PD+FOG**  **vs**  **PSP** |
| --- | --- | --- | --- | --- | --- | --- | --- |
| Cycle duration (s) | 1.09 ± 0.14 | 1.11 ± 0.12 | 1.31 ± 0.19 | **0.003** | 1.000 | **0.000** | **0.000** |
| Stance duration (s) | 0.66 ± 0.10 | 0.67 ± 0.08 | 0.82 ± 0.14 | **0.004** | 1.000 | **0.000** | **0.000** |
| Swing duration (s) | 0.43 ± 0.04 | 0.44 ± 0.05 | 0.48 ± 0.06 | **0.013** | 1.000 | **0.004** | **0.004** |
| Stance phase (% gait cycle time) | 60.34 ± 2.79 | 60.59 ± 1.89 | 62.77 ± 2.62 | **0.047** | 1.000 | **0.025** | **0.025** |
| Swing phase (% gait cycle time) | 39.11 ± 2.26 | 39.41 ± 1.88 | 37.18 ± 2.59 | 0.086 | **-** | **-** | **-** |
| Single support phase (%) | 38.91 ± 3.04 | 39.43 ± 1.90 | 37.22 ± 2.63 | 0.195 | **-** | **-** | **-** |
| Double support phase (%) | 10.58 ± 2.19 | 10.66 ± 2.18 | 12.73 ± 2.52 | **0.048** | 1.000 | **0.013** | **0.013** |
| Speed (m/s) | 0.99 ± 0.18 | 0.99 ± 0.24 | 0.71 ± 0.24 | **0.010** | 1.000 | **0.000** | **0.000** |
| Cadence (steps/minute) | 109.76 ± 14.17 | 109.65 ± 12.11 | 93.87 ± 13.76 | **0.012** | 1.000 | **0.001** | **0.001** |
| Cycle length (% height) | 1.07 ± 0.16 | 1.06 ± 0.22 | 0.89 ± 0.18 | **0.036** | 1.000 | **0.009** | **0.009** |
| Step length (m) | 0.50 ± 0.11 | 0.52 ± 0.12 | 0.42 ± 0.10 | 0.195 | **-** | **-** | **-** |
| Step width (m) | 0.09 ± 0.05 | 0.10 ± 0.04 | 0.12 ± 0.05 | **0.019** | **1.000** | **0.005** | **0.005** |


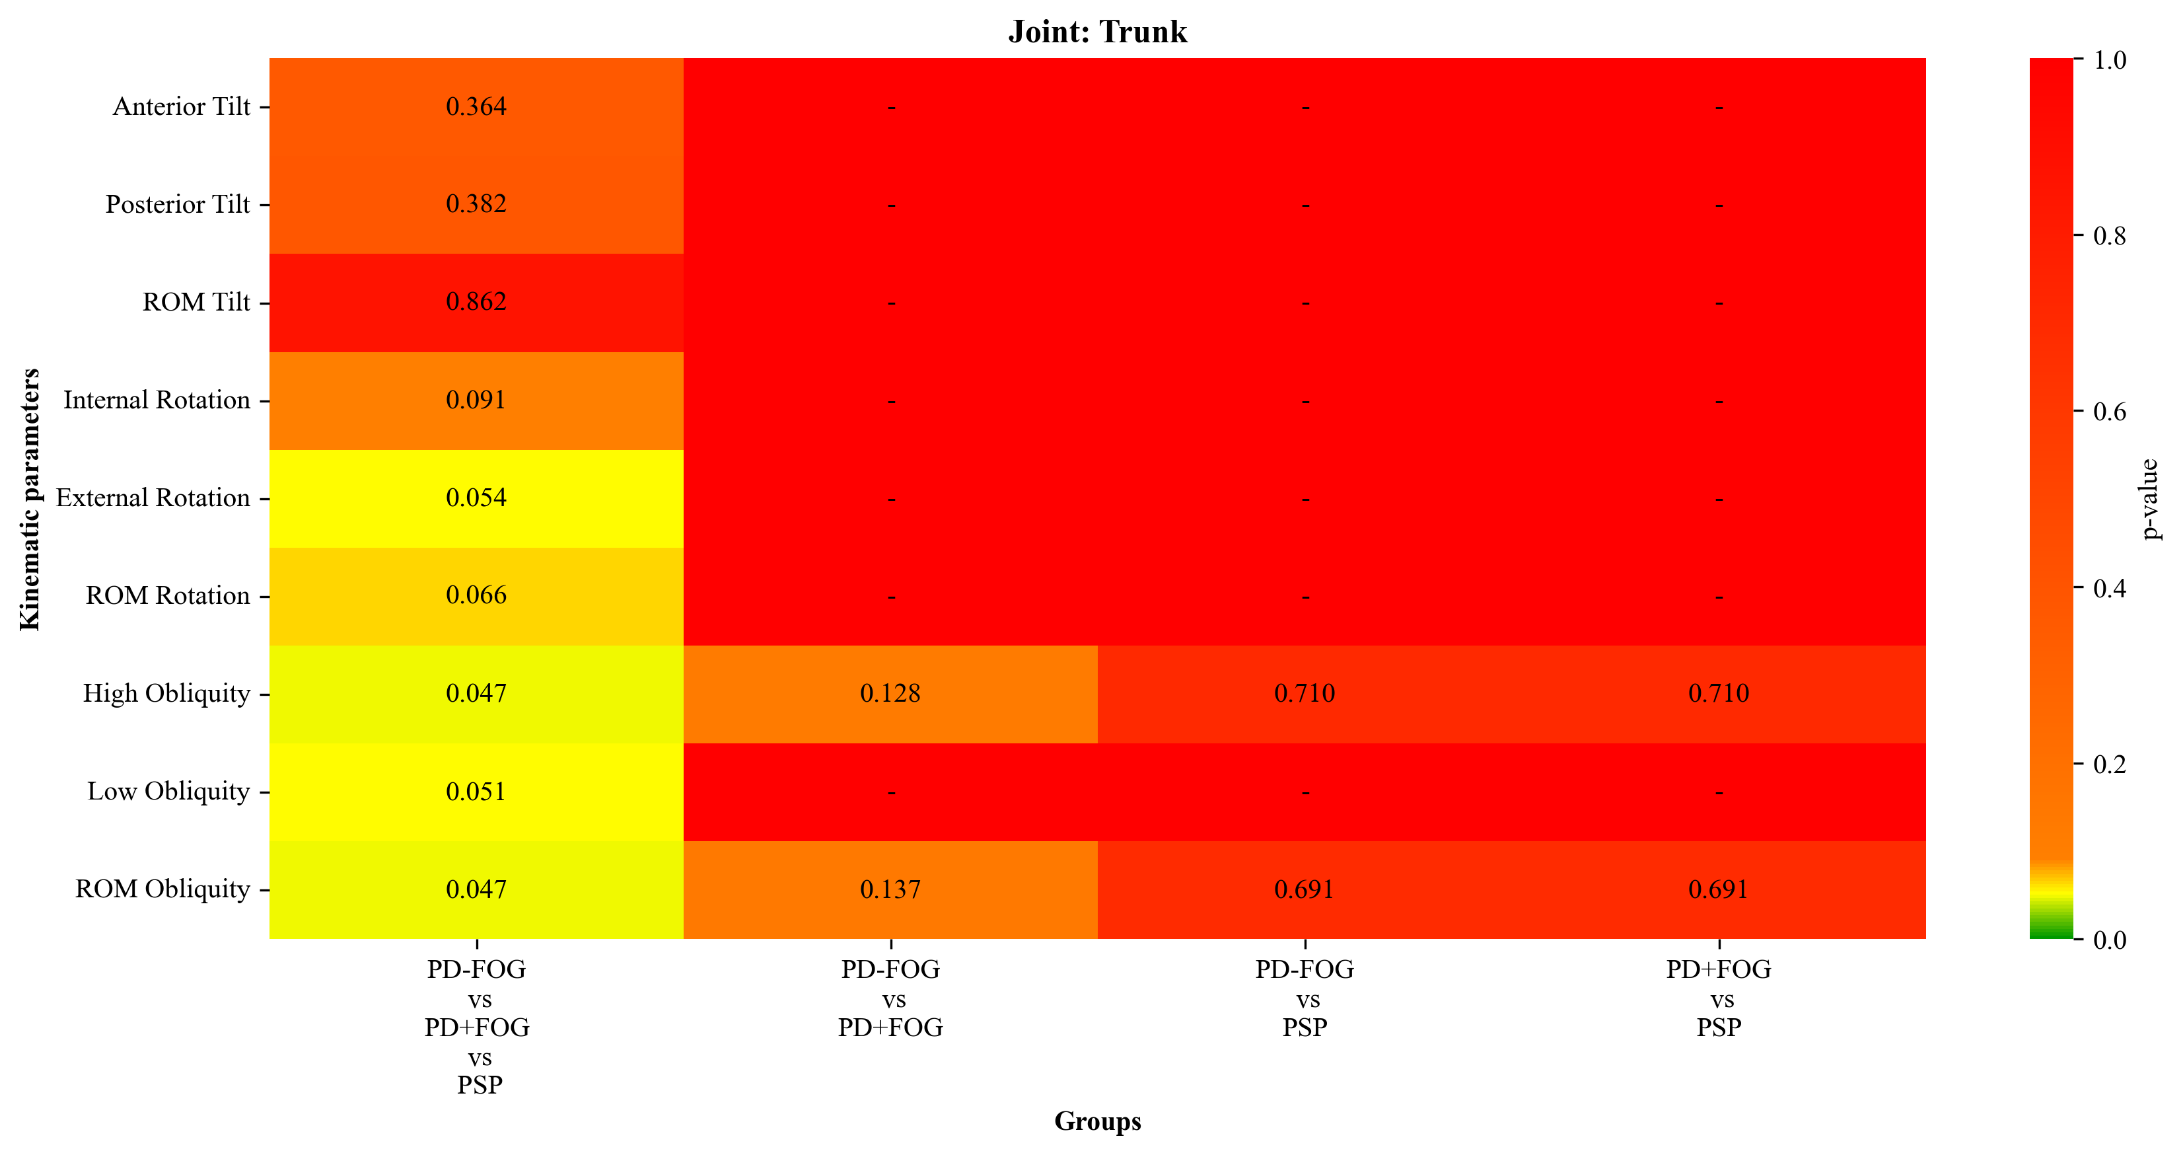


**Figure S1.** Heatmap of p-values for trunk kinematic parameters obtained from the comparison between three clinical groups during the single walking task (PD-FOG, PD+FOG, and PSP). The rows show the kinematic parameters, while the columns show the comparisons between groups and pairs. The colour scale indicates the level of statistical significance. For variables that did not show statistical significance between the three groups, no post hoc tests were performed.


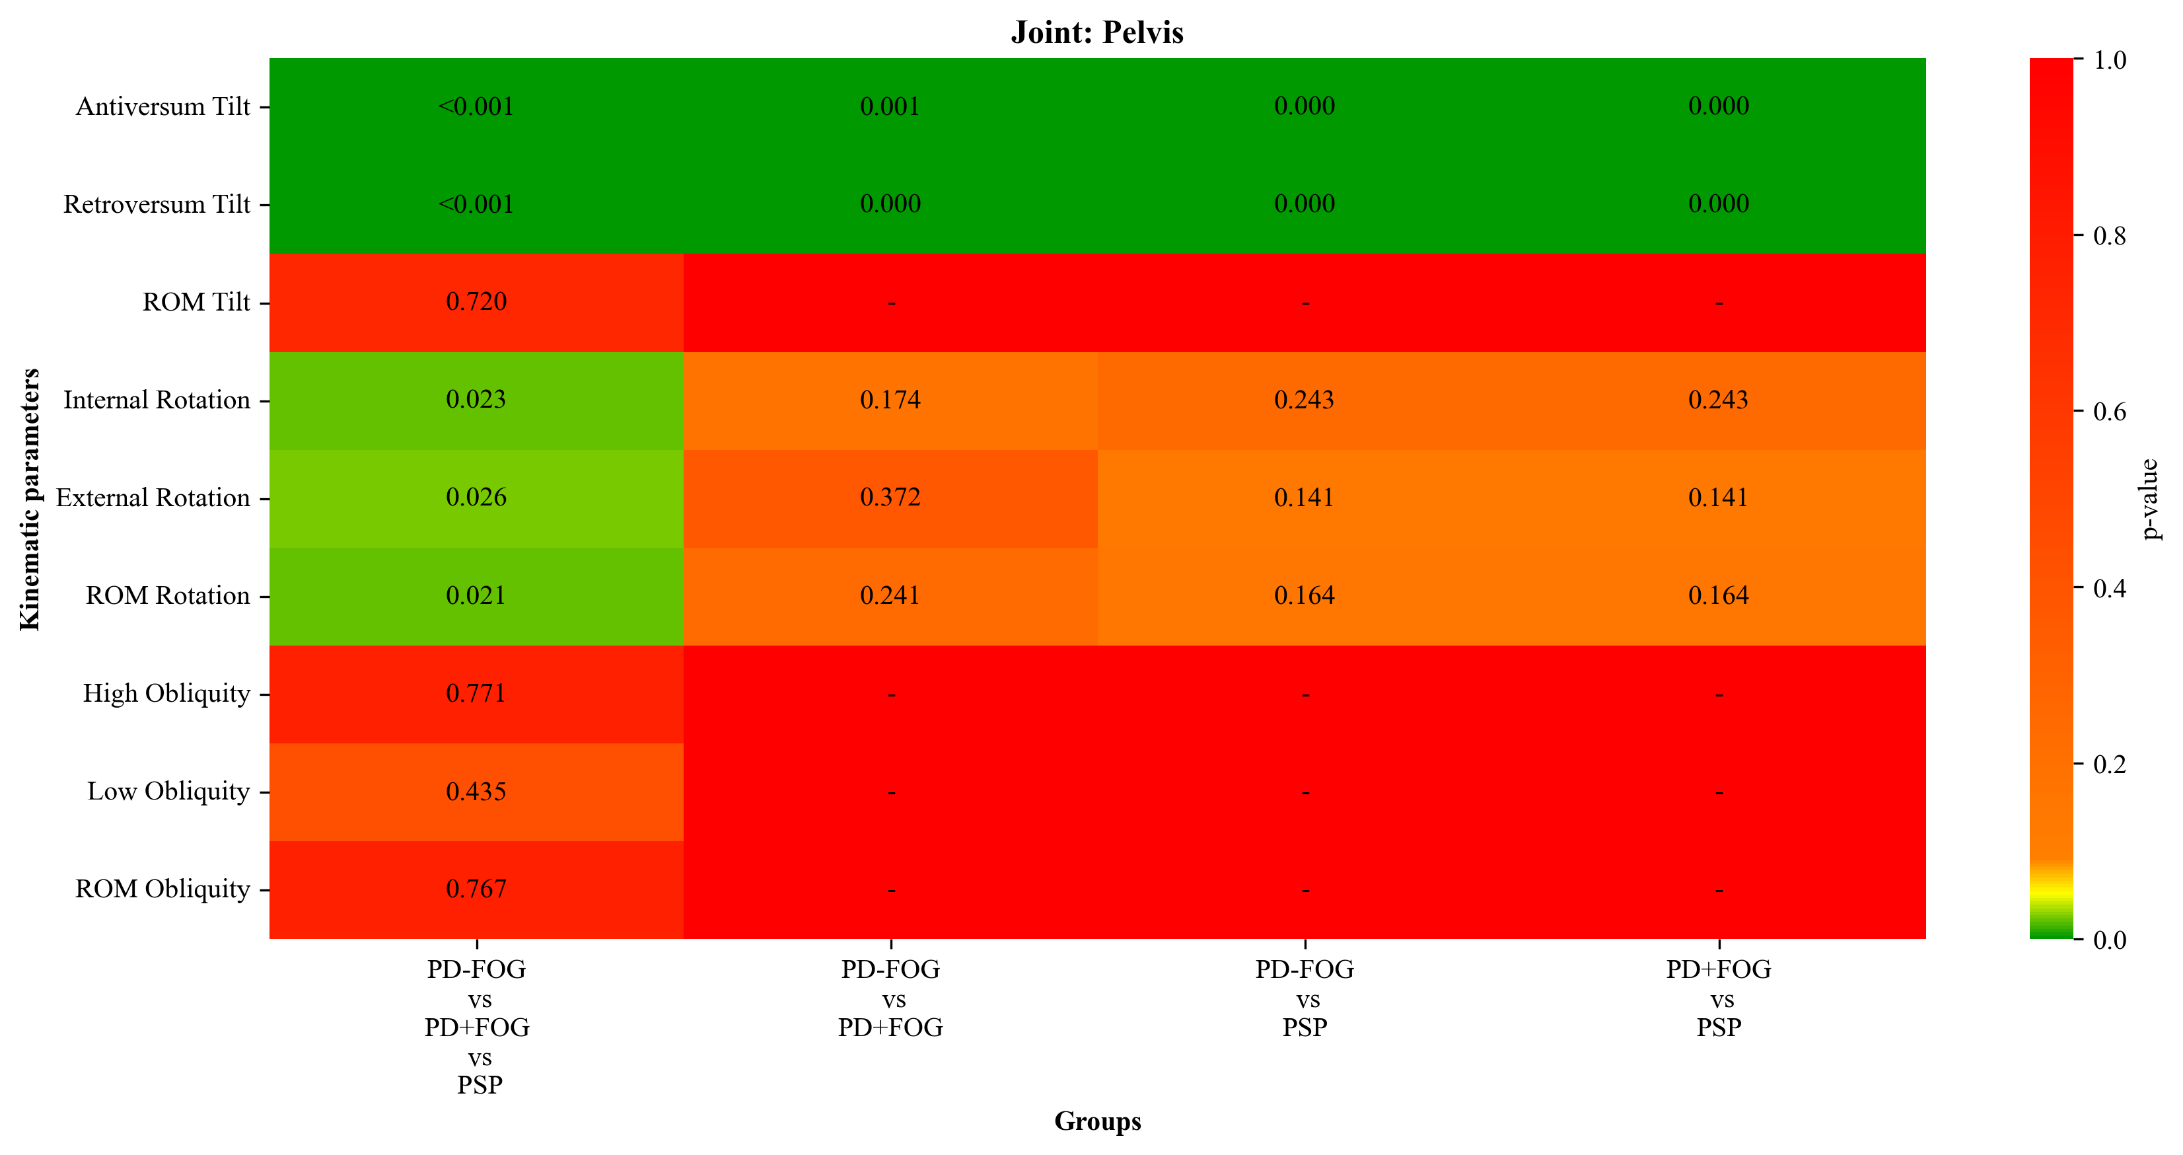


**Figure S2.** Heatmap of p-values for pelvis kinematic parameters obtained from the comparison between three clinical groups during the single walking task (PD-FOG, PD+FOG, and PSP). The rows show the kinematic parameters, while the columns show the comparisons between groups and pairs. The colour scale indicates the level of statistical significance. For variables that did not show statistical significance between the three groups, no post hoc tests were performed.


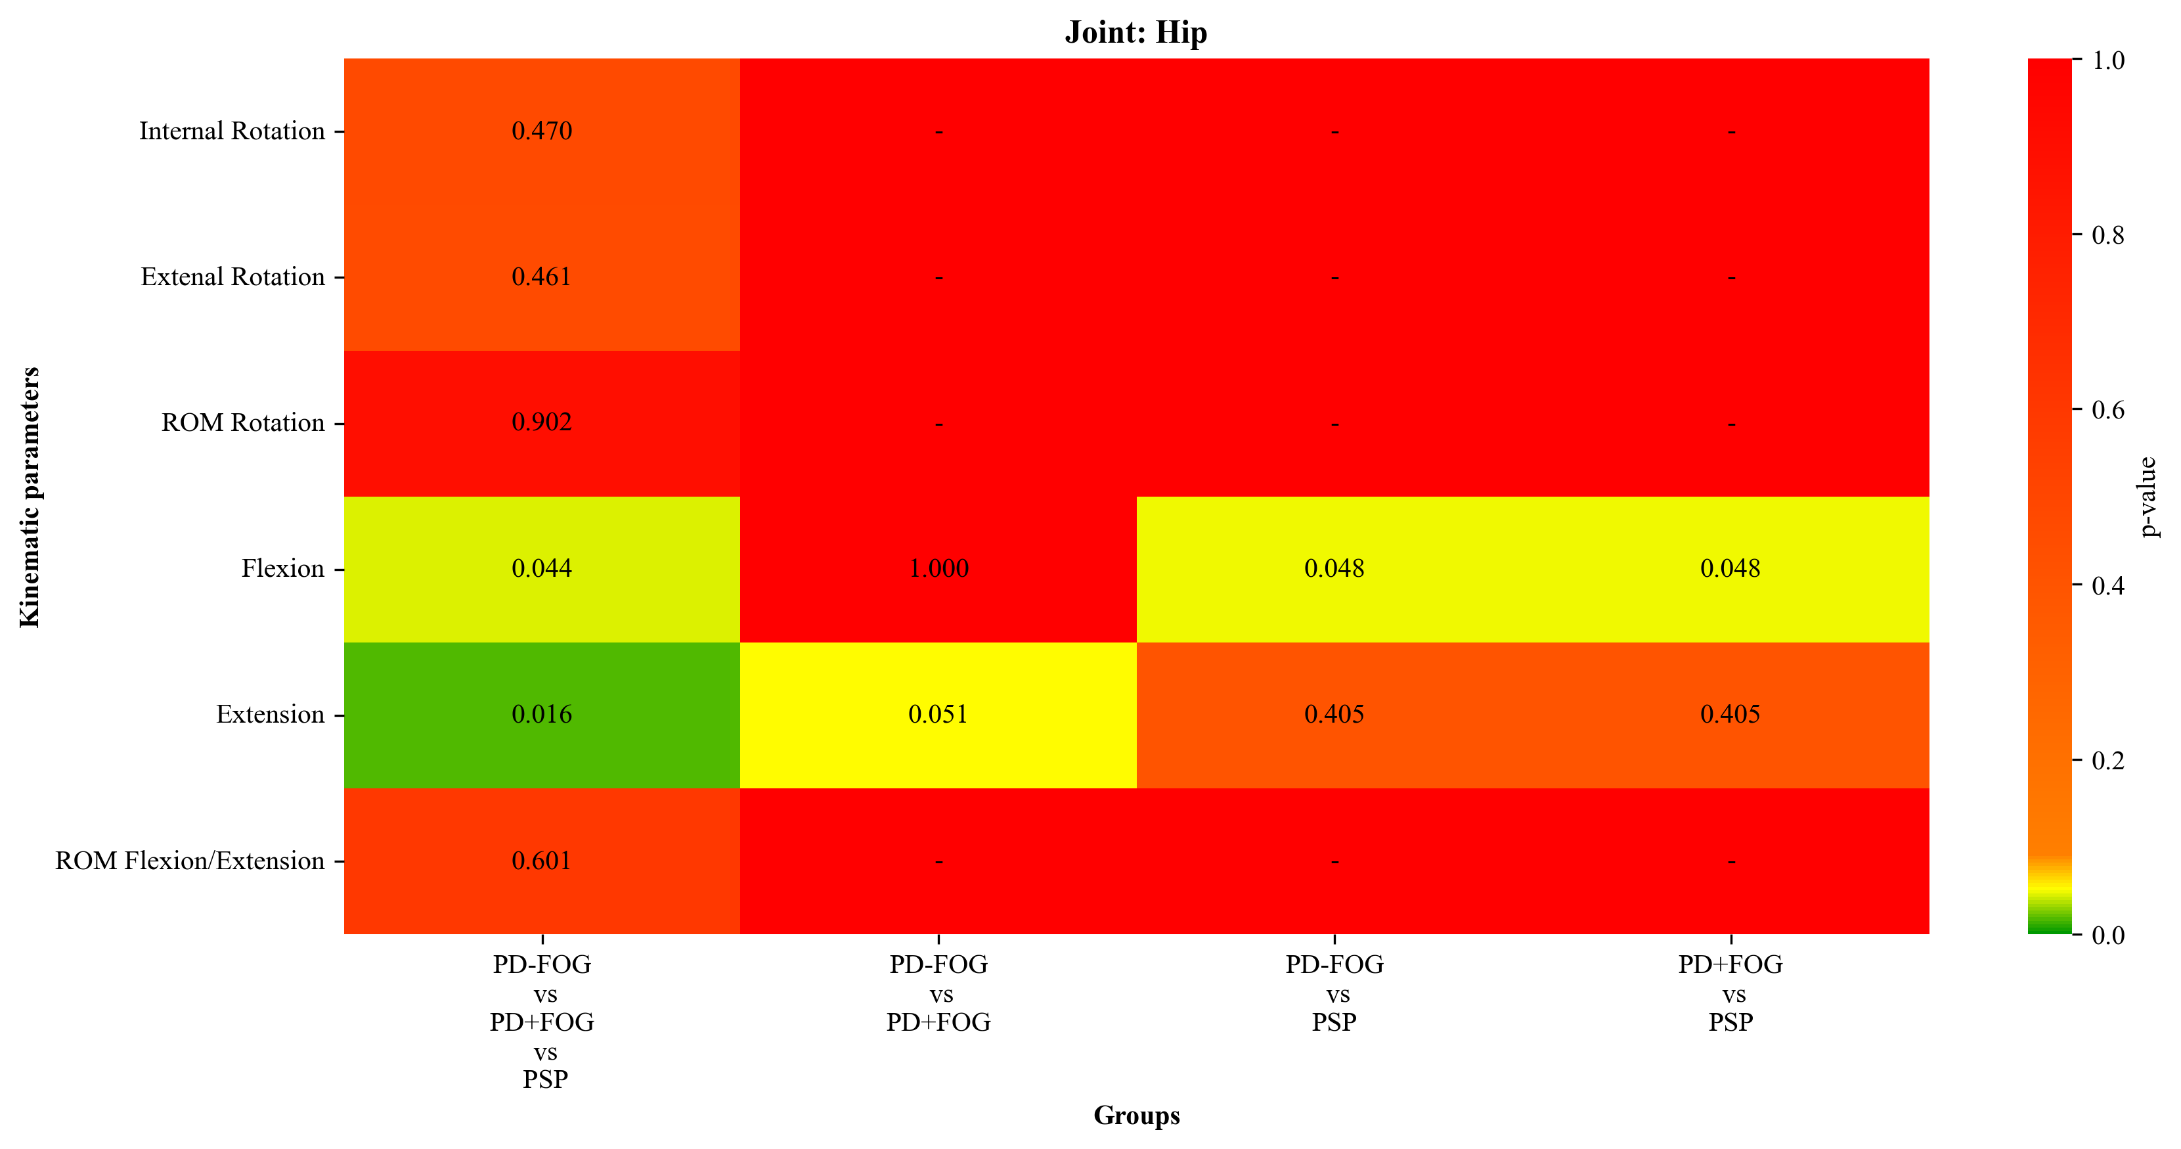


**Figure S3.** Heatmap of p-values for hip kinematic parameters obtained from the comparison between three clinical groups during the single walking task (PD-FOG, PD+FOG, and PSP). The rows show the kinematic parameters, while the columns show the comparisons between groups and pairs. The colour scale indicates the level of statistical significance. For variables that did not show statistical significance between the three groups, no post hoc tests were performed.


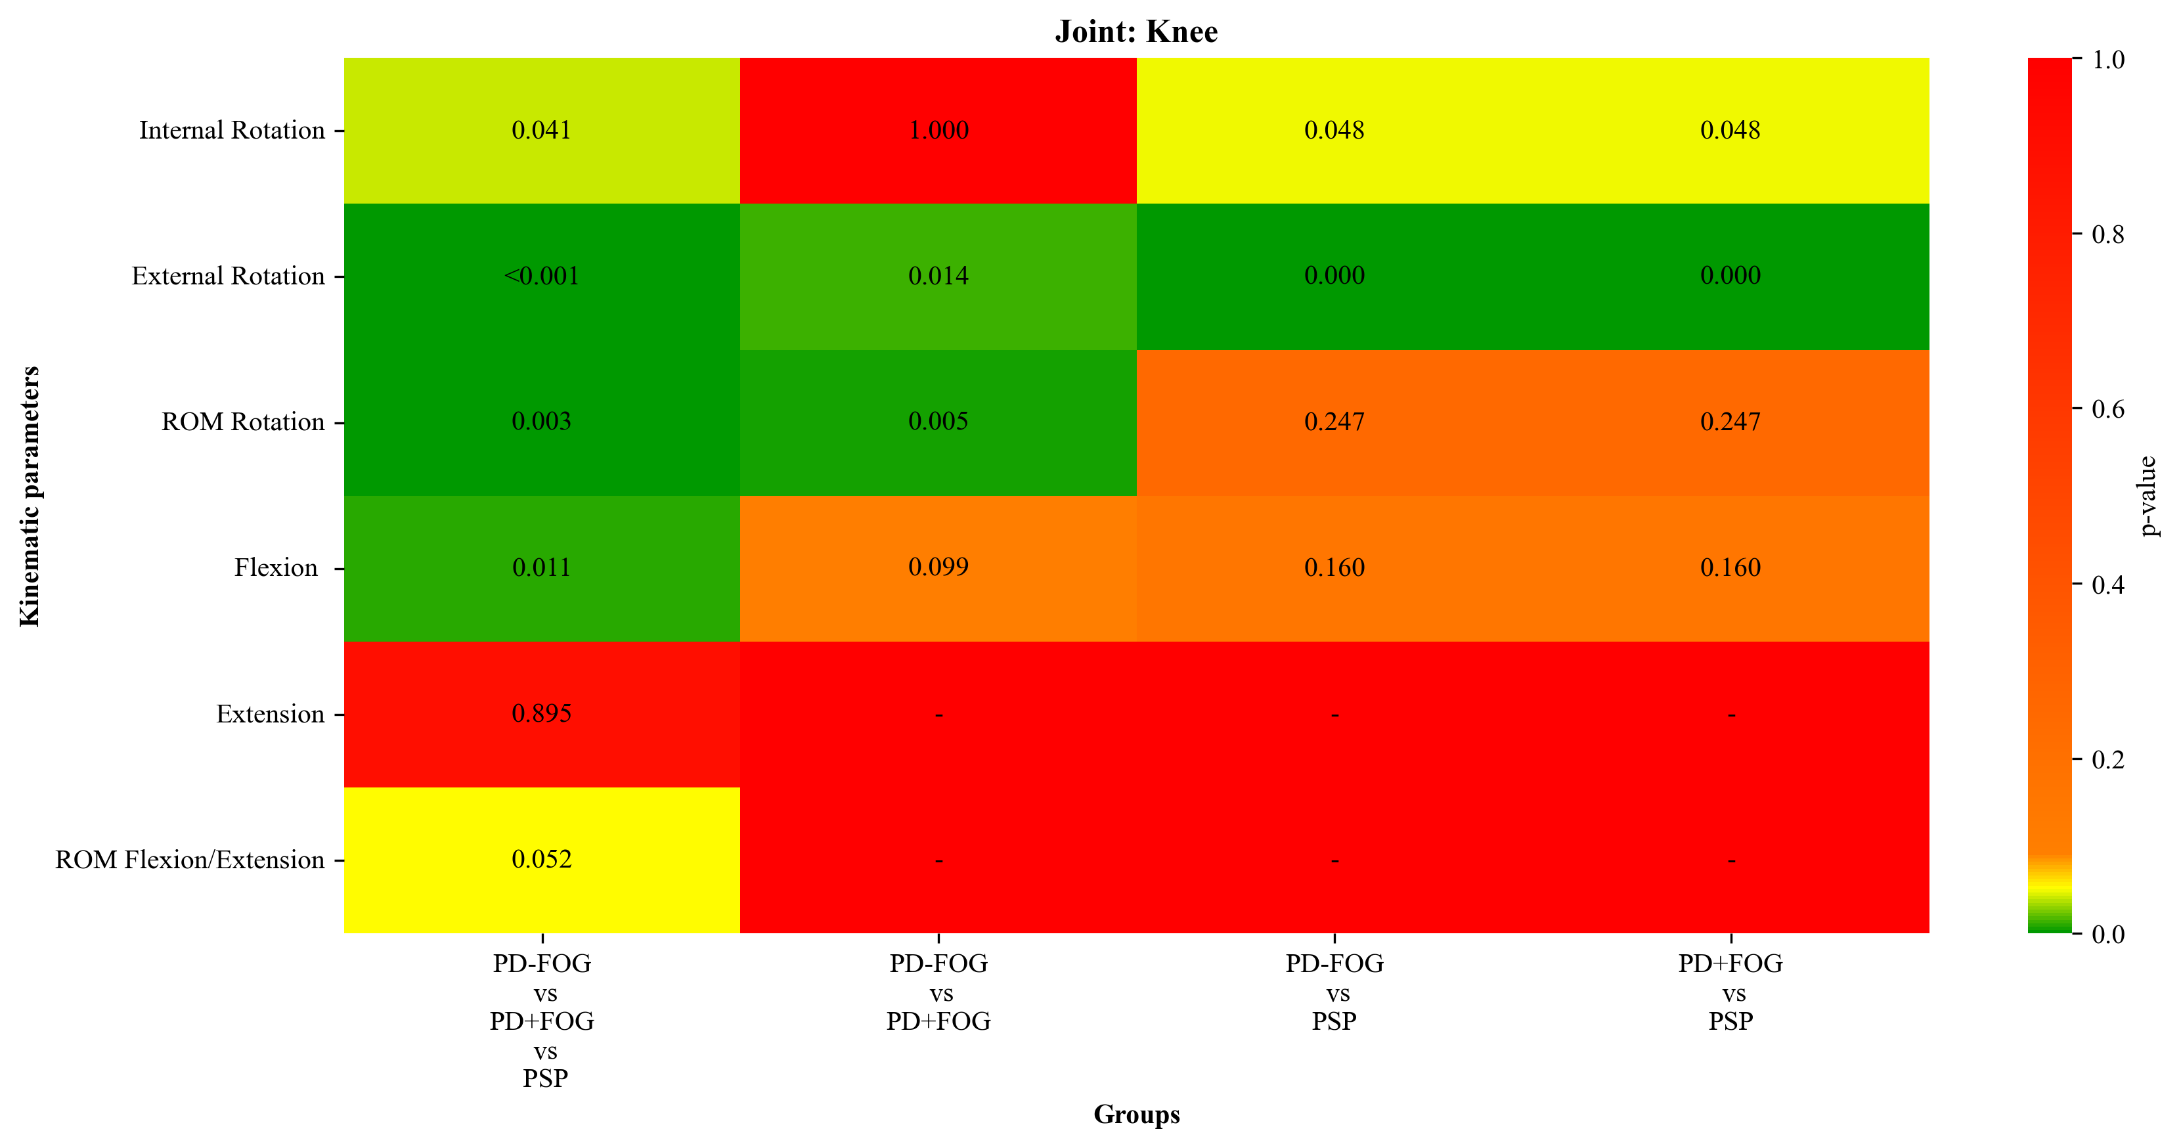


**Figure S4.** Heatmap of p-values for knee kinematic parameters obtained from the comparison between three clinical groups during the single walking task (PD-FOG, PD+FOG, and PSP). The rows show the kinematic parameters, while the columns show the comparisons between groups and pairs. The colour scale indicates the level of statistical significance. For variables that did not show statistical significance between the three groups, no post hoc tests were performed.


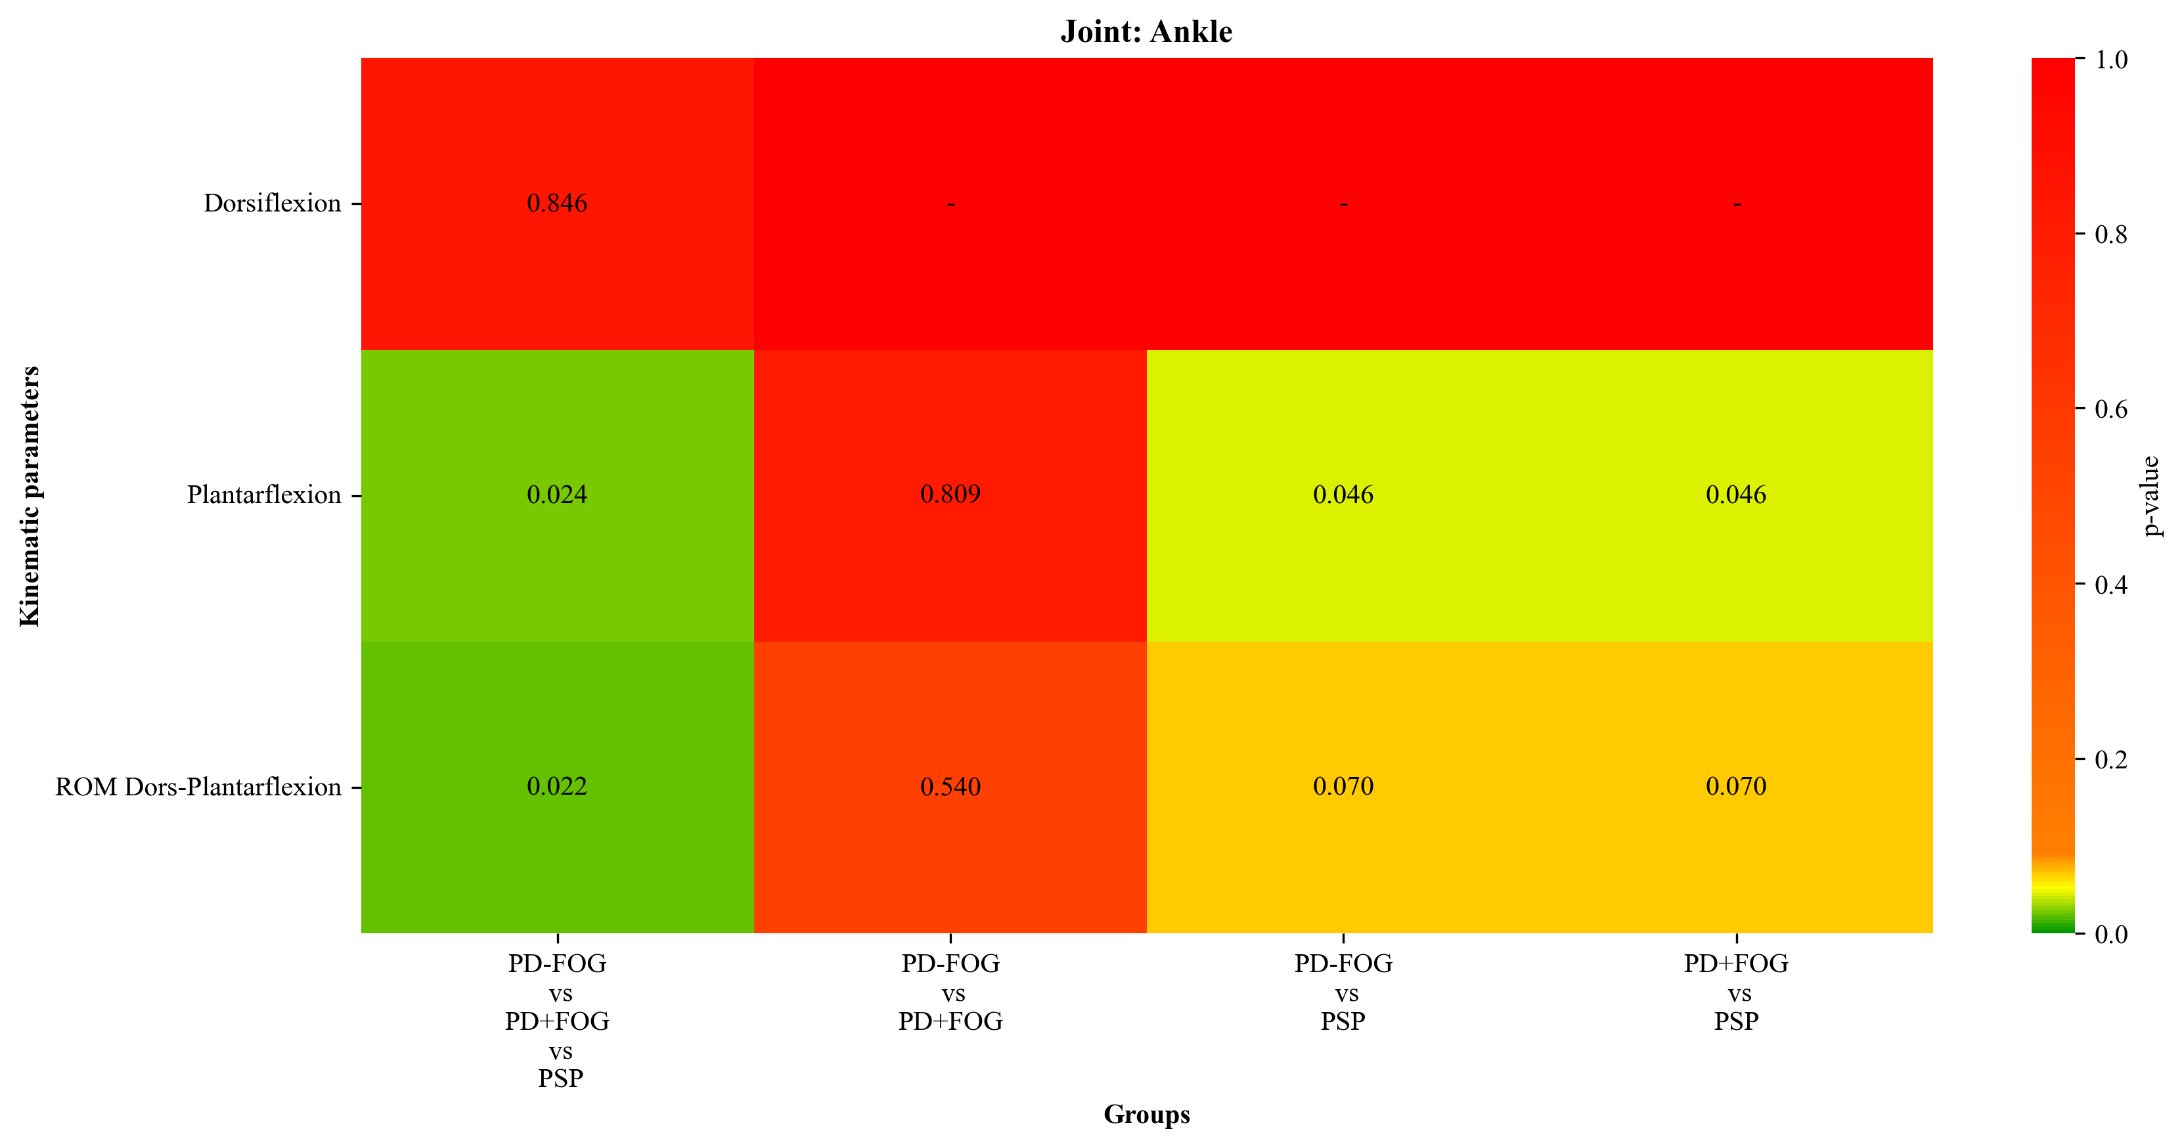


**Figure S5.** Heatmap of p-values for ankle kinematic parameters obtained from the comparison between three clinical groups during the single walking task (PD-FOG, PD+FOG, and PSP). The rows show the kinematic parameters, while the columns show the comparisons between groups and pairs. The colour scale indicates the level of statistical significance. For variables that did not show statistical significance between the three groups, no post hoc tests were performed.

**KINEMATIC AND SPATIOTEMPORAL FEAURES RESULTS EXTRACTED FROM THE DUAL COGNITIVE TASK**

**Table S3**. Kinematic variables of PD with and without FOG and PSP extracted from dual cognitive task. Mean, standard deviation and p-values for each group were reported.

| **Joint** | **Kinematic Variables** | **PD-FOG** | **PD+FOG** | **PSP** | **p-value** | **PD-FOG vs**  **PD+FOG** | **PD-FOG vs**  **PSP** | **PD+FOG vs**  **PSP** |
| --- | --- | --- | --- | --- | --- | --- | --- | --- |
| Trunk | Anterior Tilt | 39.83 ± 9.77 | 43.27 ± 10.99 | 45.98 ± 13.48 | 0.190 | **-** | **-** | **-** |
| Posterior Tilt | 36.86 ± 10.05 | 40.27 ± 10.87 | 43.17 ± 13.54 | 0.180 | **-** | **-** | **-** |
| ROM Tilt | 2.97 ± 1.13 | 3.00 ± 1.53 | 2.81 ± 1.36 | 0.712 | **-** | **-** | **-** |
| Internal Rotation | -3.11 ± 1.12 | -3.63 ± 1.46 | -3.88 ± 2.41 | 0.164 | **-** | **-** | **-** |
| External Rotation | 2.93 ± 1.25 | 3.50 ± 1.49 | 3.82 ± 2.25 | 0.085 | **-** | **-** | **-** |
| ROM Rotation | 6.03 ± 2.31 | 7.13 ± 2.92 | 7.70 ± 4.38 | 0.105 | **-** | **-** | **-** |
| High Obliquity | 1.81 ± 1.16 | 1.84 ± 1.15 | 1.62 ± 0.87 | 0.993 | **-** | **-** | **-** |
| Low Obliquity | -1.83 ± 1.15 | -2.19 ± 1.74 | -1.65 ± 0.93 | 0.615 | **-** | **-** | **-** |
| ROM Obliquity | 3.64 ± 2.31 | 4.03 ± 2.72 | 3.27 ± 1.79 | 0.781 | **-** | **-** | **-** |
| Pelvis | Antiversum Tilt | 12.24 ± 7.39 | 8.41 ± 8.00 | 6.65 ± 5.59 | **0.007** | 0.200 | **0.042** | **0.042** |
| Retroversum Tilt | 9.29 ± 7.54 | 5.19 ± 7.92 | 3.59 ± 5.83 | **0.007** | 0.152 | **0.047** | **0.047** |
| ROM Tilt | 2.95 ± 1.34 | 3.22 ± 1.39 | 3.07 ± 2.30 | 0.738 | **-** | **-** | **-** |
| Internal Rotation | -2.96 ± 1.23 | -3.27 ± 1.47 | -3.80 ± 1.50 | 0.105 | **-** | **-** | **-** |
| External Rotation | 2.96 ± 1.12 | 3.34 ± 1.82 | 4.07 ± 2.10 | 0.068 | **-** | **-** | **-** |
| ROM Rotation | 5.92 ± 2.30 | 6.61 ± 3.14 | 7.86 ± 3.29 | 0.066 | **-** | **-** | **-** |
| High Obliquity | 1.93 ± 0.88 | 2.36 ± 1.30 | 2.00 ± 1.14 | 0.561 | **-** | **-** | **-** |
| Low Obliquity | -1.87 ± 0.81 | -2.43 ± 1.44 | -1.84 ± 1.14 | 0.425 | **-** | **-** | **-** |
| ROM Obliquity | 3.80 ± 1.61 | 4.80 ± 2.67 | 3.84 ± 2.13 | 0.467 | **-** | **-** | **-** |
| Hip | Internal Rotation | 18.13 ± 24.21 | 9.14 ± 8.54 | 11.61 ± 17.76 | 0.258 | **-** | **-** | **-** |
| Extenal Rotation | -2.04 ± 20.67 | -4.40 ± 8.00 | -5.30 ± 19.48 | 0.427 | **-** | **-** | **-** |
| ROM Rotation | 20.18 ± 27.97 | 13.55 ± 3.58 | 16.90 ± 20.79 | 0.743 | **-** | **-** | **-** |
| Flexion | 34.38 ± 17.65 | 26.27 ± 11.16 | 24.74 ± 9.69 | **0.021** | 0.128 | 0.263 | 0.263 |
| Extension | 1.99 ± 20.26 | -10.02 ± 13.02 | -9.86 ± 6.88 | **0.011** | **0.010** | 0.651 | 0.651 |
| ROM Flexion/Extension | 32.40 ± 13.70 | 36.29 ± 9.18 | 34.60 ± 10.75 | 0.616 | **-** | **-** | **-** |
| Knee | Internal Rotation | 0.04 ± 22.51 | -2.68 ± 13.56 | 6.77 ± 16.16 | 0.256 | **-** | **-** | **-** |
| External Rotation | -24.56 ± 14.91 | -20.88 ± 15.53 | -9.91 ± 15.38 | **0.019** | 1.000 | **0.017** | **0.017** |
| ROM Rotation | 24.61 ± 18.92 | 18.21 ± 6.60 | 16.68 ± 7.35 | 0.209 | **-** | **-** | **-** |
| Flexion | 51.95 ± 17.24 | 49.60 ± 6.39 | 47.04 ± 15.94 | 0.532 | **-** | **-** | **-** |
| Extension | 5.18 ± 12.89 | 0.26 ± 7.71 | 4.95 ± 16.08 | 0.826 | **-** | **-** | **-** |
| ROM Flexion/Extension | 46.77 ± 18.26 | 49.35 ± 6.45 | 42.09 ± 7.56 | 0.629 | **-** | **-** | **-** |
| Ankle | Dorsiflexion | 11.30 ± 4.52 | 11.07 ± 5.03 | 13.41 ± 4.35 | 0.400 | **-** | **-** | **-** |
| Plantarflexion | -11.49 ± 5.61 | -11.52 ± 6.08 | -7.91 ± 7.54 | 0.196 | **-** | **-** | **-** |
| ROM Dors-Plantarflexion | 22.79 ± 4.89 | 22.59 ± 6.01 | 21.31 ± 7.01 | 0.457 | **-** | **-** | **-** |

**Table S4.** Spatiotemporal variables of PD with and without FOG and PSP extracted from dual cognitive task. Mean, standard deviation and p-values for each group were reported.

| **Spatiotemporal Variables** | **PD-FOG** | **PD+FOG** | **PSP** | **p-value** | **PD-FOG**  **vs**  **PD+FOG** | **PD-FOG vs**  **PSP** | **PD+FOG**  **vs**  **PSP** |
| --- | --- | --- | --- | --- | --- | --- | --- |
| Cycle duration (s) | 1.17 ± 0.21 | 1.22 ± 0.22 | 1.44 ± 0.24 | **0.006** | 1.000 | **0.001** | **0.001** |
| Stance duration (s) | 0.74 ± 0.16 | 0.76 ± 0.16 | 0.95 ± 0.20 | **0.008** | 1.000 | **0.001** | **0.001** |
| Swing duration (s) | 0.44 ± 0.05 | 0.46 ± 0.07 | 0.49 ± 0.07 | **0.019** | 0.775 | **0.032** | **0.032** |
| Stance phase (% gait cycle time) | 62.65 ± 2.85 | 62.25 ± 2.81 | 65.77 ± 3.70 | 0.092 | **-** | **-** | **-** |
| Swing phase (% gait cycle time) | 37.57 ± 2.76 | 39.22 ± 6.69 | 34.24 ± 3.71 | 0.542 | **-** | **-** | **-** |
| Single support phase (%) | 37.21 ± 3.43 | 37.76 ± 2.81 | 34.24 ± 3.71 | 0.231 | **-** | **-** | **-** |
| Double support phase (%) | 12.59 ± 2.55 | 13.79 ± 4.92 | 15.97 ± 3.74 | **0.021** | 0.695 | **0.042** | **0.042** |
| Speed (m/s) | 0.84 ± 0.23 | 0.83 ± 0.26 | 0.53 ± 0.23 | **0.004** | 1.000 | **0.000** | **0.000** |
| Cadence (steps/minute) | 105.07 ± 15.06 | 101.62 ± 17.98 | 85.88 ± 14.33 | **0.005** | 1.000 | **0.001** | **0.001** |
| Cycle length (% height) | 0.96 ± 0.21 | 0.96 ± 0.21 | 0.73 ± 0.20 | **0.016** | 1.000 | **0.001** | **0.001** |
| Step length (m) | 0.44 ± 0.12 | 0.46 ± 0.12 | 0.36 ± 0.11 | 0.213 | **-** | **-** | **-** |
| Step width (m) | 0.13 ± 0.13 | 0.10 ± 0.04 | 0.13 ± 0.05 | 0.408 | **-** | **-** | **-** |


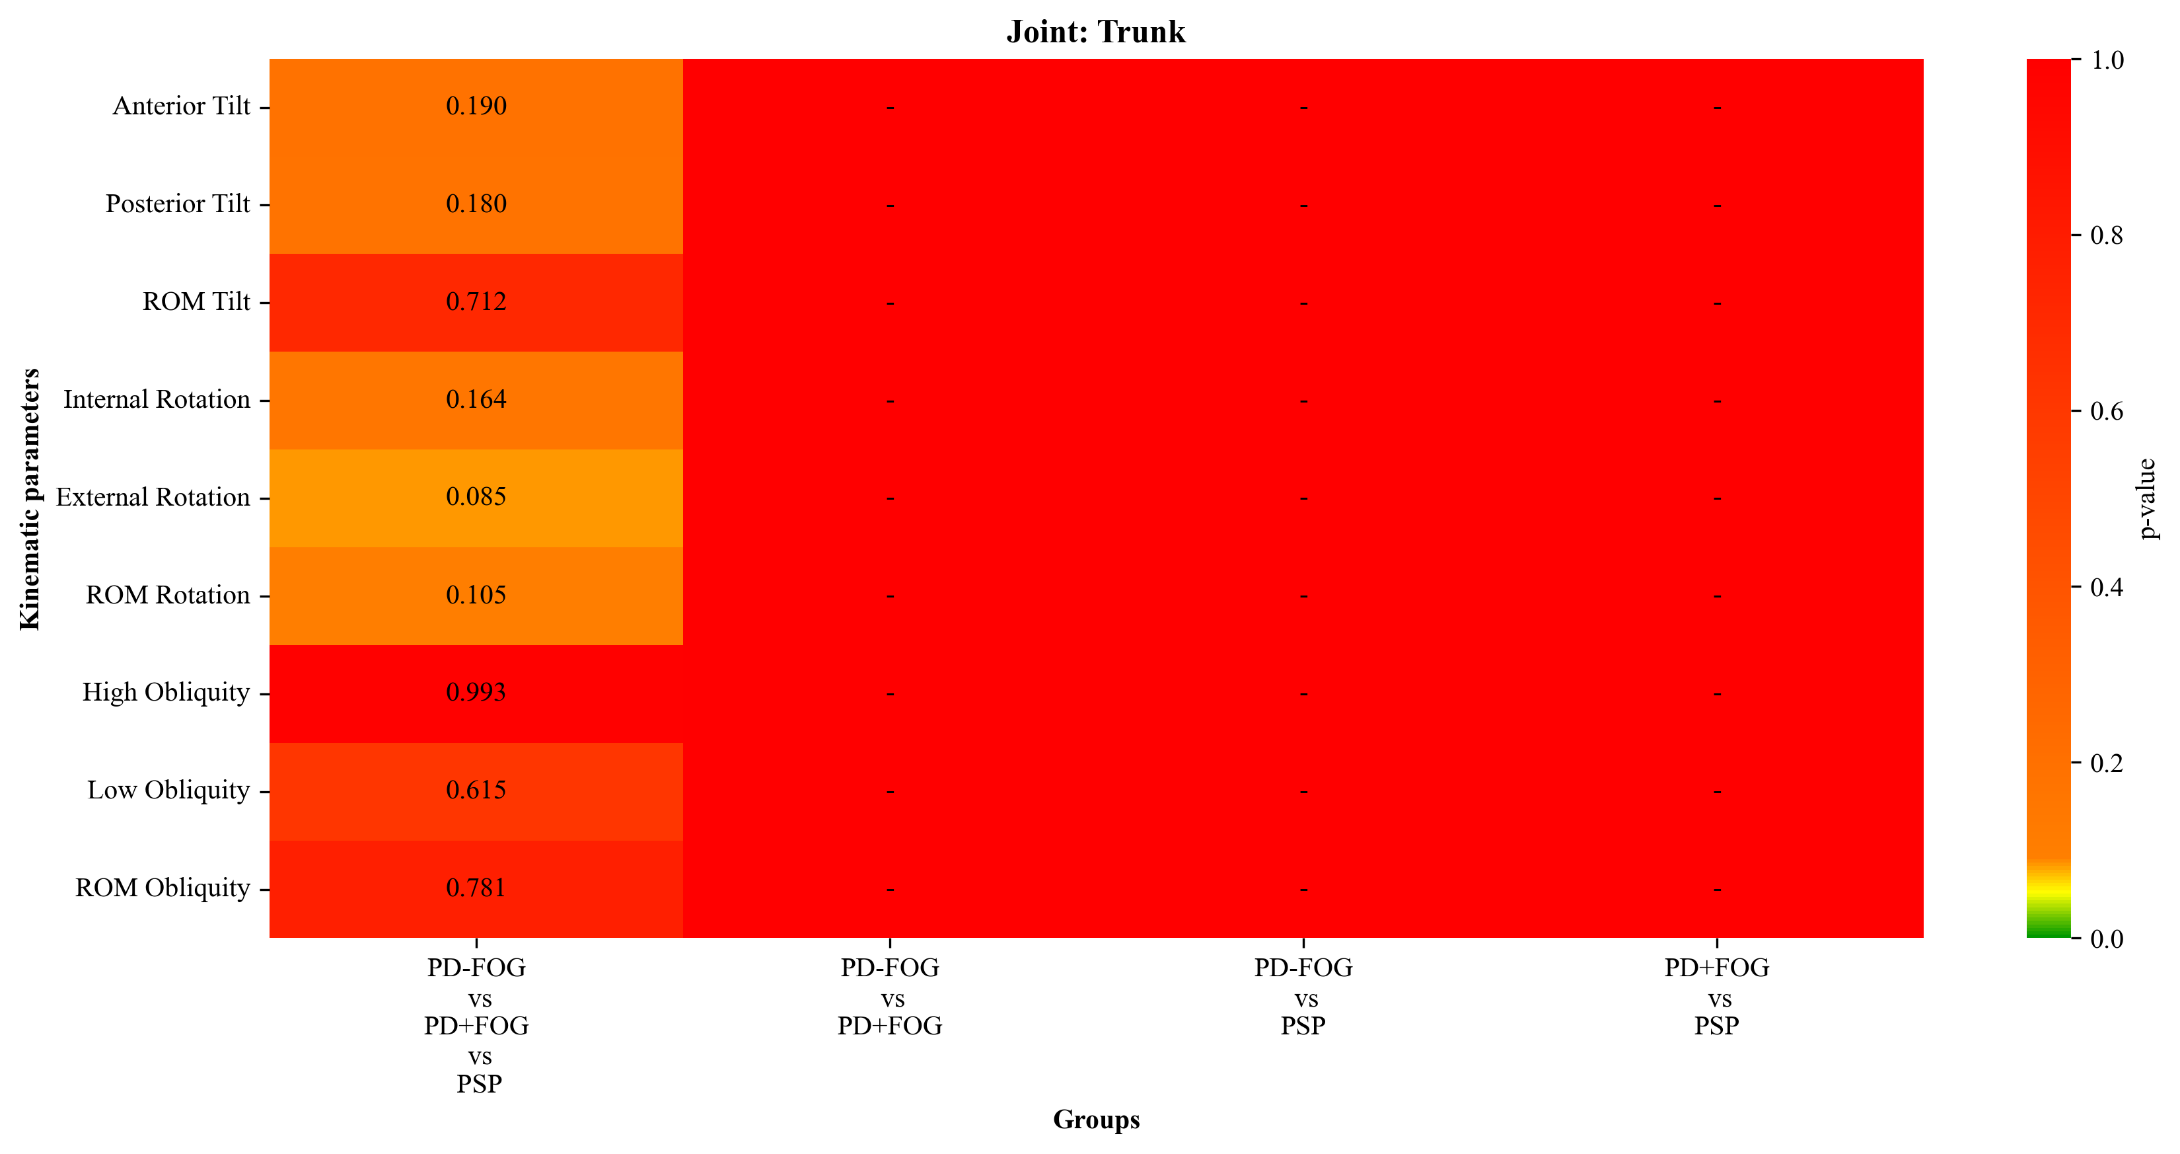


**Figure S6**. Heatmap of p-values for trunk kinematic parameters obtained from the comparison between three clinical groups during the dual cognitive task (PD-FOG, PD+FOG, and PSP). The rows show the kinematic parameters, while the columns show the comparisons between groups and pairs. The colour scale indicates the level of statistical significance. For variables that did not show statistical significance between the three groups, no post hoc tests were performed.


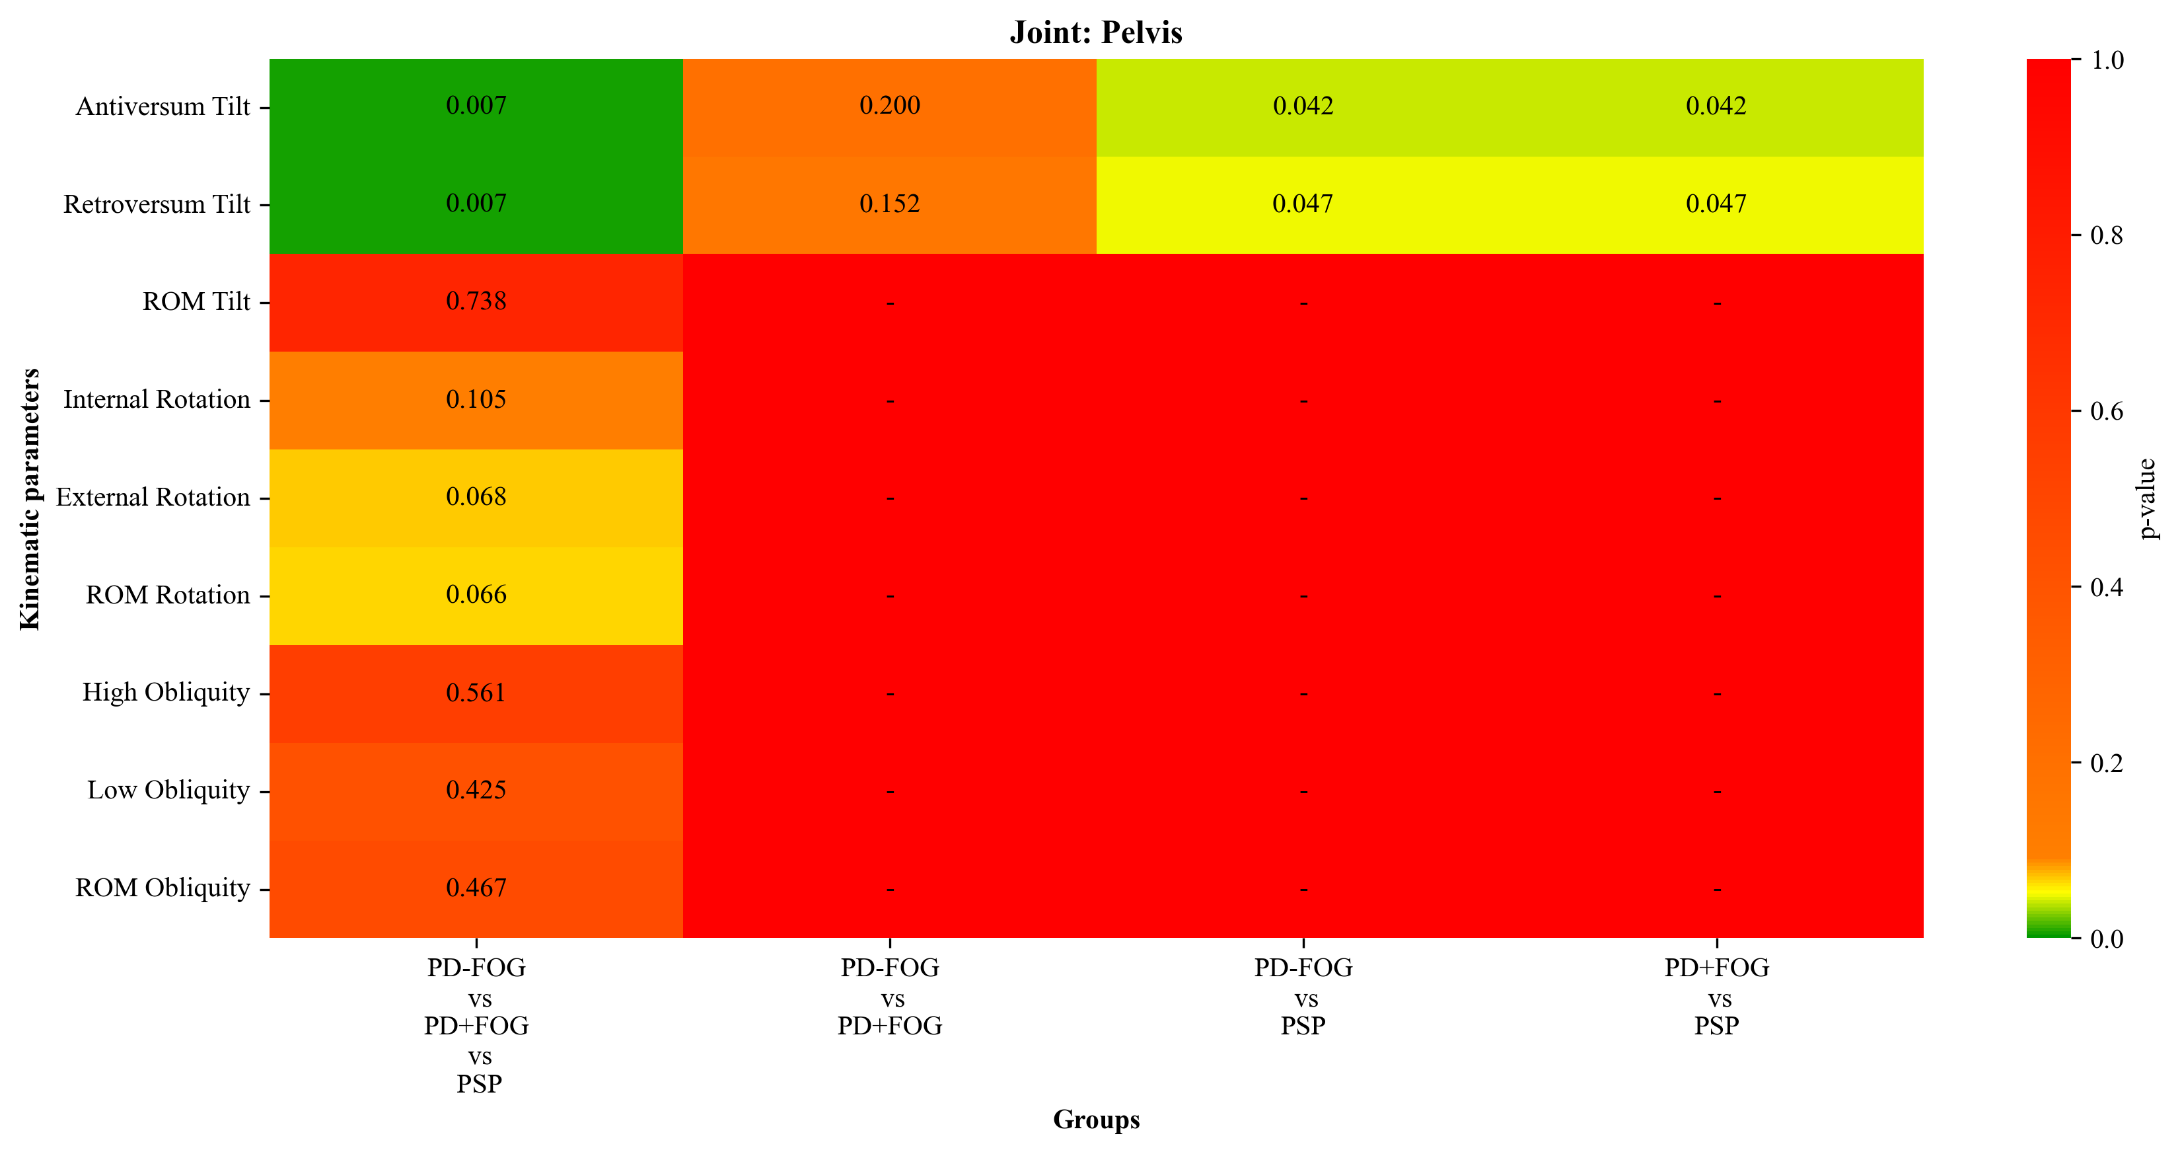


**Figure S7**. Heatmap of p-values for pelvis kinematic parameters obtained from the comparison between three clinical groups during the dual cognitive task (PD-FOG, PD+FOG, and PSP). The rows show the kinematic parameters, while the columns show the comparisons between groups and pairs. The colour scale indicates the level of statistical significance. For variables that did not show statistical significance between the three groups, no post hoc tests were performed.


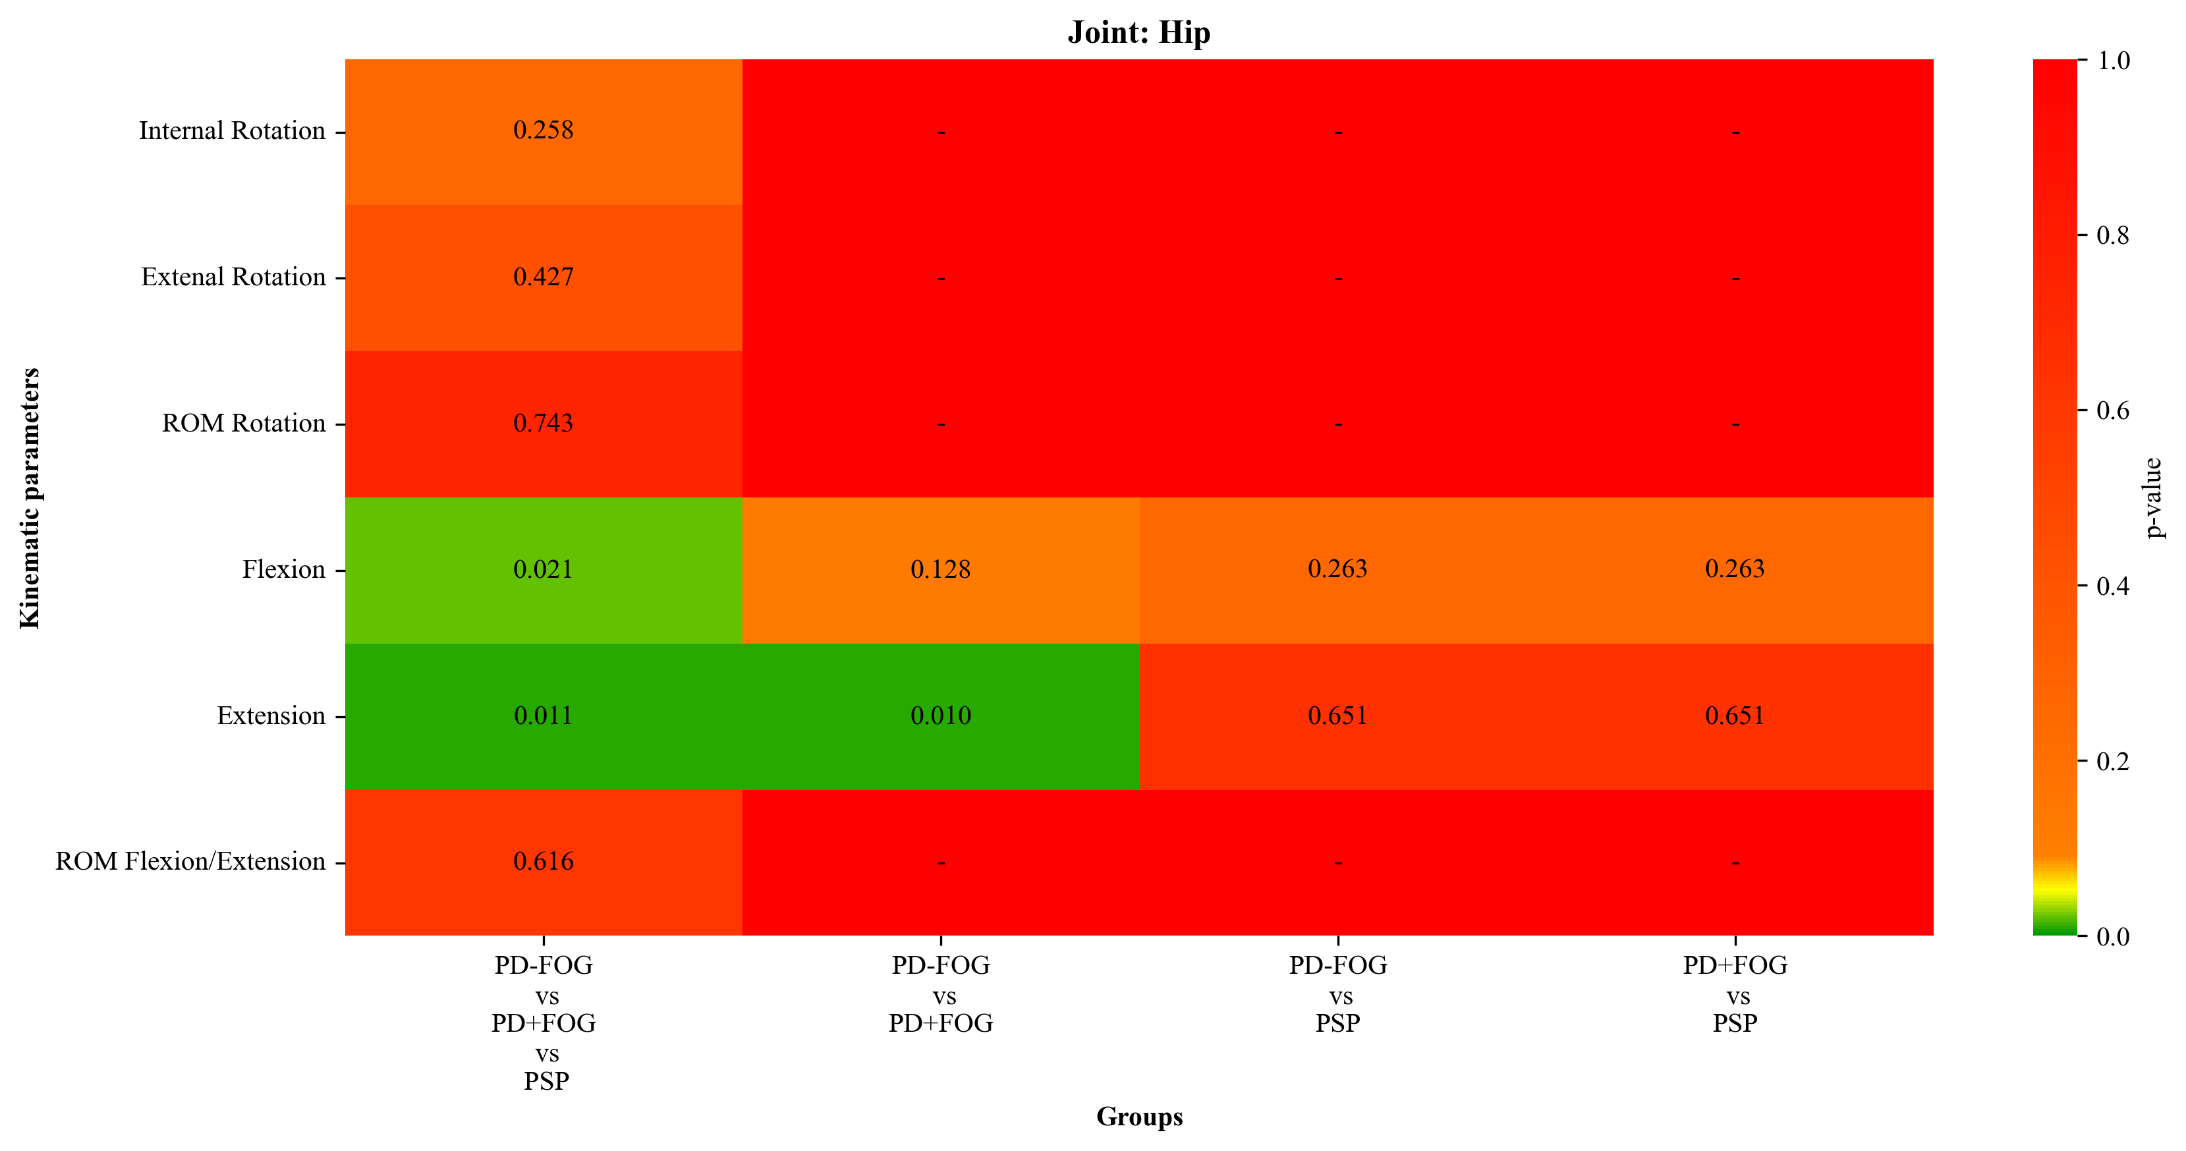


**Figure S8.** Heatmap of p-values for hip kinematic parameters obtained from the comparison between three clinical groups during the dual cognitive task (PD-FOG, PD+FOG, and PSP). The rows show the kinematic parameters, while the columns show the comparisons between groups and pairs. The colour scale indicates the level of statistical significance. For variables that did not show statistical significance between the three groups, no post hoc tests were performed.


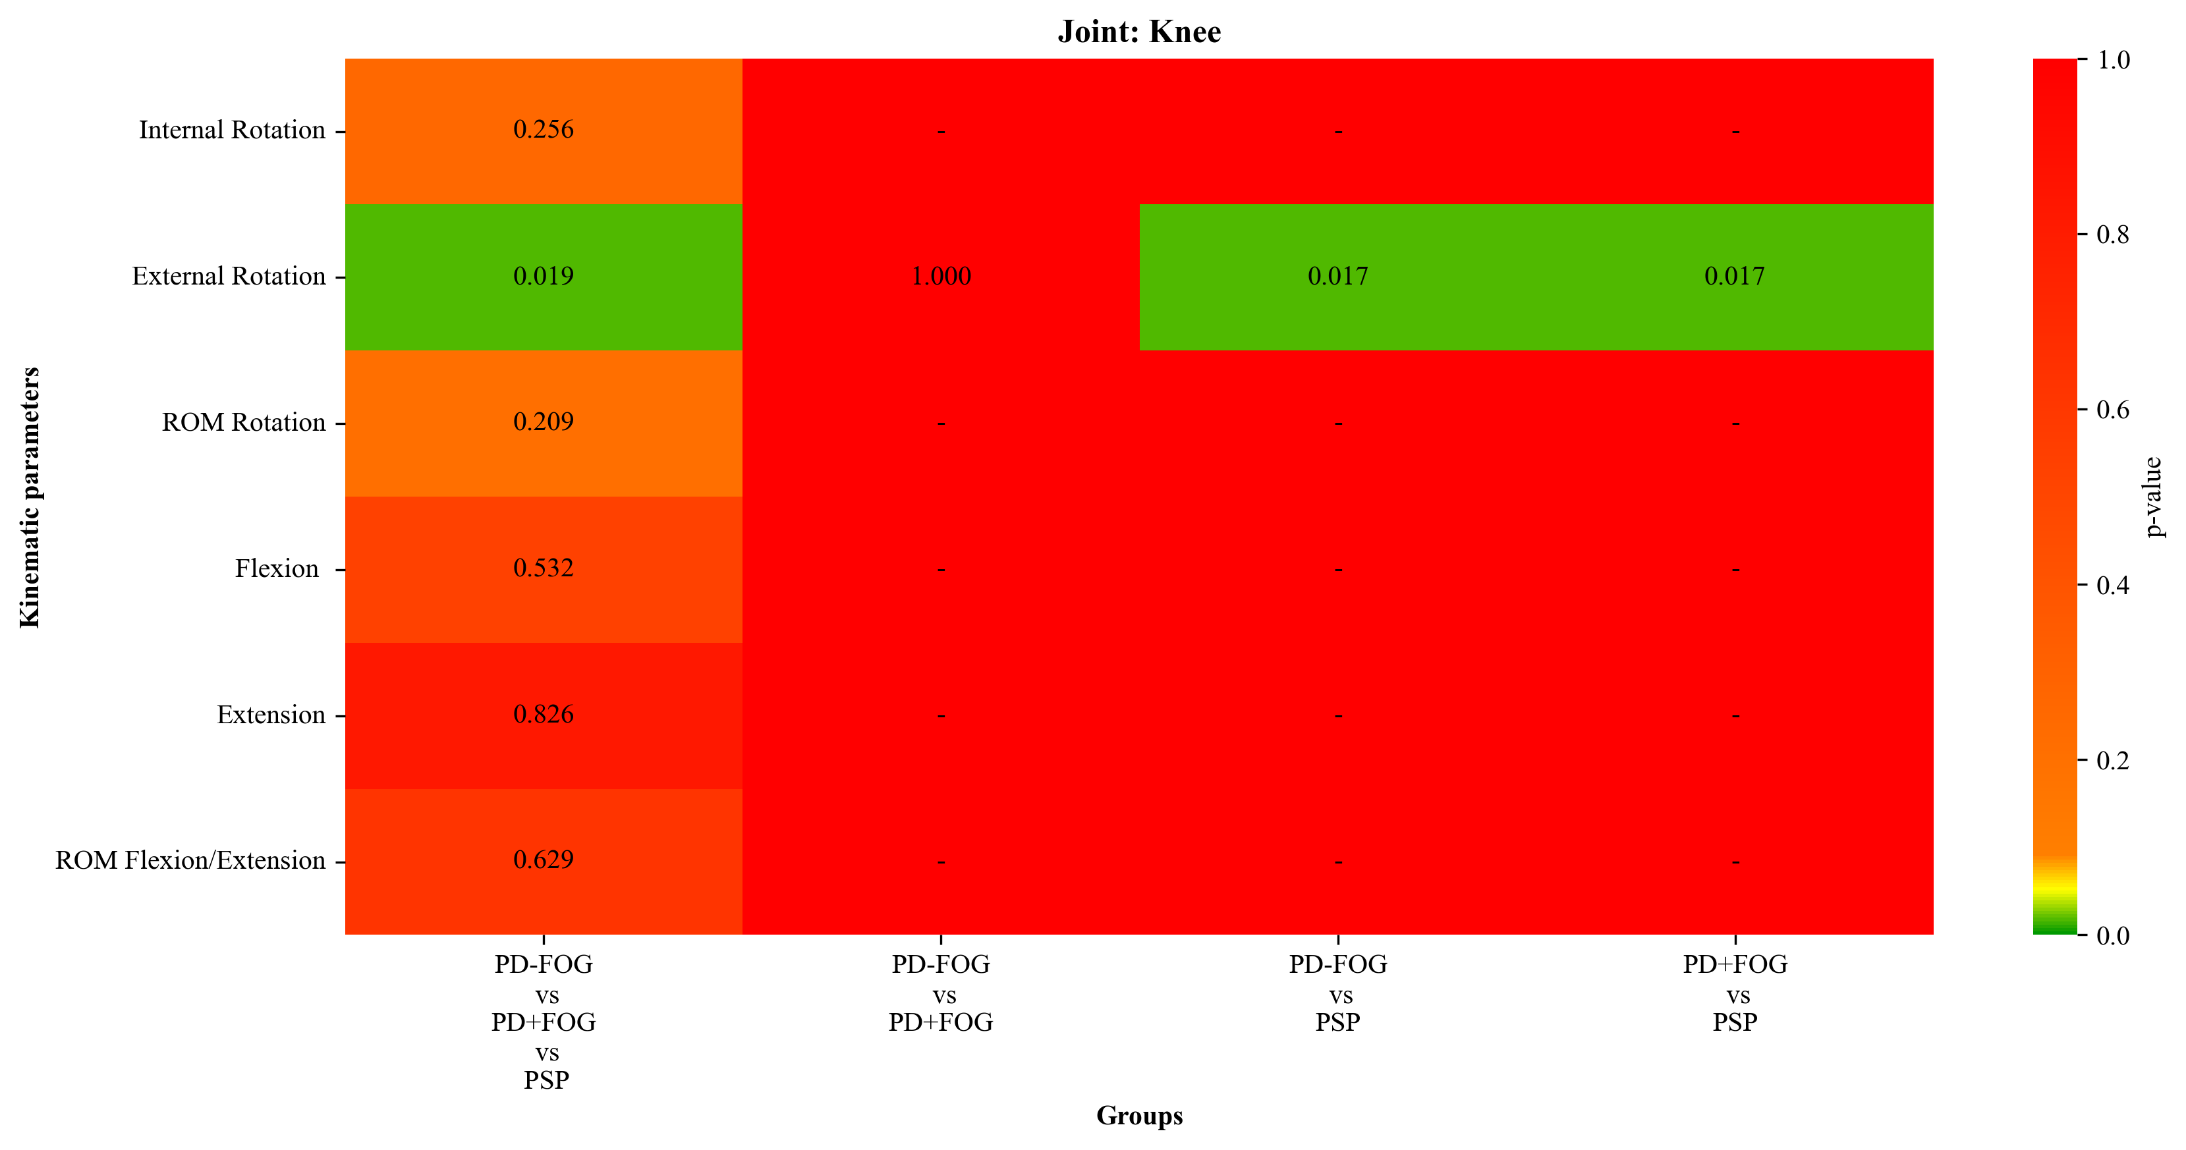


**Figure S9.** Heatmap of p-values for knee kinematic parameters obtained from the comparison between three clinical groups during the dual cognitive task (PD-FOG, PD+FOG, and PSP). The rows show the kinematic parameters, while the columns show the comparisons between groups and pairs. The colour scale indicates the level of statistical significance. For variables that did not show statistical significance between the three groups, no post hoc tests were performed.


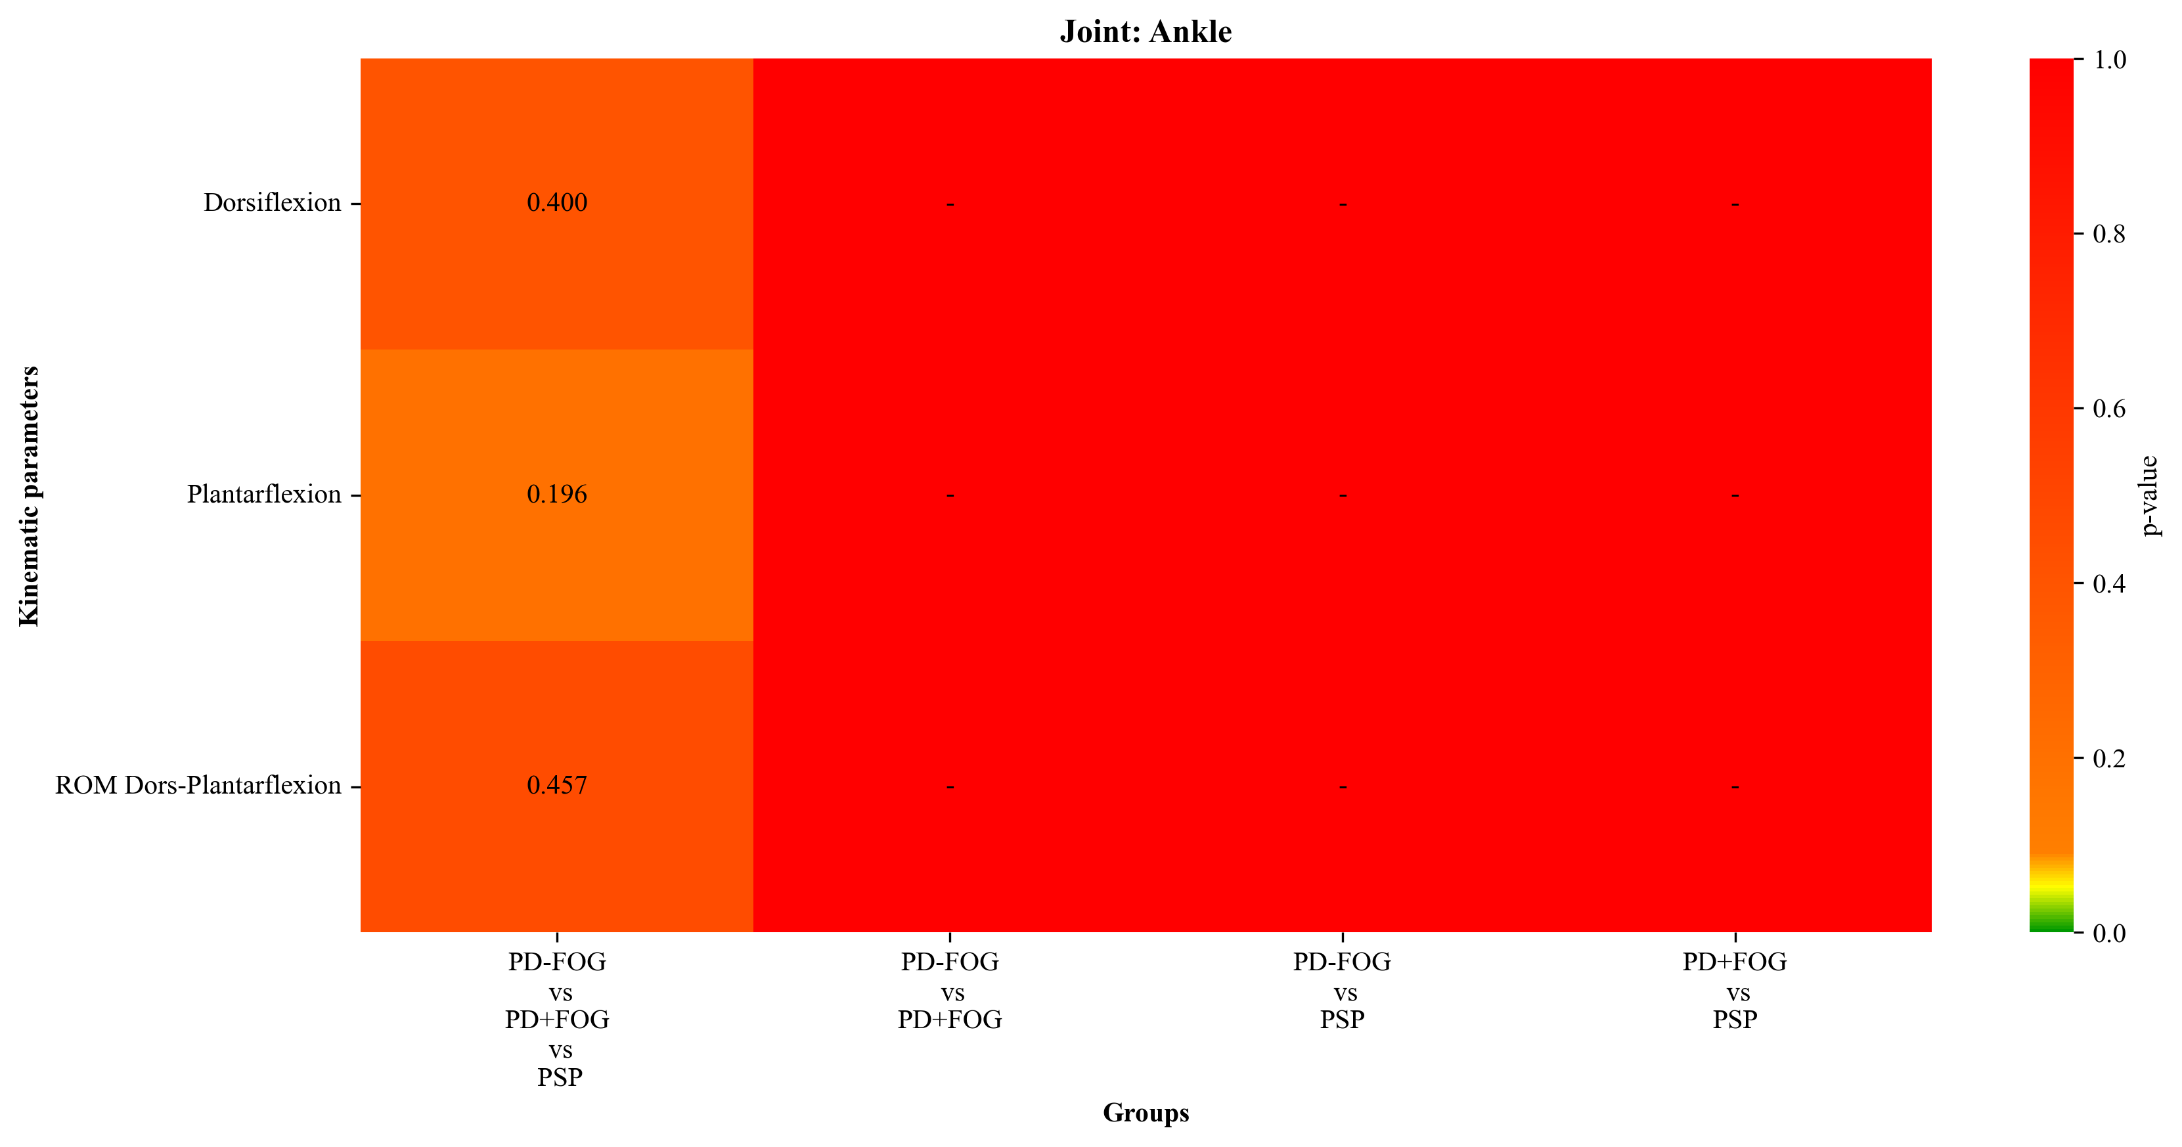


**Figure S10.** Heatmap of p-values for ankle kinematic parameters obtained from the comparison between three clinical groups during the dual cognitive task (PD-FOG, PD+FOG, and PSP). The rows show the kinematic parameters, while the columns show the comparisons between groups and pairs. The colour scale indicates the level of statistical significance. For variables that did not show statistical significance between the three groups, no post hoc tests were performed.
